# Supplementary material for: Long-Term Outcomes of Deep Brain Stimulation in Pantothenate Kinase-Associated Neurodegeneration-Related Dystonia
Source: PubMed Central journal article supplement — J Mov Disord. 2022 Jul 26;15(3):241–8. doi: 10.14802/jmd.22002 (PMC9536911; doi:10.14802/jmd.22002), 2022-07-26
Supplement: jmd-22002-suppl1.pdf [file jmd-22002-suppl1.pdf]

**Supplementary Table 1.** Serial BFMDRS scores and detailed clinical outcome after DBS implantation

|                                 | Patients                                     |           |                                  |                                                    |          |          |                                  |                      |          |          |
|---------------------------------|----------------------------------------------|-----------|----------------------------------|----------------------------------------------------|----------|----------|----------------------------------|----------------------|----------|----------|
|                                 | A                                            | B         | C                                | D                                                  | E        | F        | G                                | H                    | I        | J        |
| DBS date                        | Sep 2010                                     | Jul 2015  | Sep 2015                         | Oct 2012                                           | Dec 2007 | Jan 2015 | Jul 2009                         | Nov 2011             | May 2009 | Feb 2019 |
| Dates of additional surgery     | -                                            | -         | Feb 2016 (Lt. electrode removal) | May 2014 (DBS removal)<br>June 2014 (GKS both GPi) | -        | -        | -                                | -                    | -        | -        |
| Dates of battery change         | Oct 2012<br>May 2015<br>Aug 2017<br>Jul 2019 | June 2020 | Feb 2020                         | -                                                  | -        | Apr 2020 | Apr 2013<br>Oct 2014<br>Nov 2017 | Dec 2012<br>Nov 2016 | Sep 2012 | -        |
| Serial BFMDRS-M/D (120/30) (mo) |                                              |           |                                  |                                                    |          |          |                                  |                      |          |          |
| Baseline                        | 96/29                                        | 100/29    | 108.5/28                         | 76.5/30                                            | 79.5/29  | 55/17    | 44.5/15                          | 32/-                 | 46/14    | 15/11    |
| 3                               | 69/24                                        | 50/26     | -                                | 73/22                                              | 79.5/29  | 41.5/5   | 44.5/14                          | -                    | 56/14    | 9/4      |
| 6                               | 74.5/24                                      | 32/19     | 100/30                           | 114/29                                             | 72/29    | 41.5/5   | 39/8                             | -                    | 43.5/11  | 13/3     |
| 12                              | 88/27                                        | 41/19     | 100/29                           | DBS removed, GKS 20 mo                             | 80/29    | -        | 43/12                            | -                    | 39/10    | 10/4     |
| 24                              | 84/30                                        | 28/22     | 100.5/29                         | 74/22 (24 mo)                                      | -        | -        | 34/13                            | -                    | 31/11    | 7/15     |
| 36                              | 60.5/29                                      | 34/21     | 100.5/29                         | 72/24 (27 mo)                                      | -        | -        | 27/20                            | 15/-                 | -        | -        |
| 60                              | 75/28                                        | 35/25     | 100.5/29                         | 76/28 (33 mo)                                      | -        | -        | 23.5/21                          | 28.5/- (72 mo)       | -        | -        |
| 84                              | 74/29                                        | -         | -                                | 104/25 (45 mo)                                     | -        | -        | 41.5/22                          | -                    | -        | -        |
| 120                             | 83/30                                        | -         | -                                | -                                                  | -        | -        | -                                | -                    | -        | -        |

BFMDRS, Burke–Fahn–Marsden Dystonia Rating Scale; DBS, deep brain stimulation; Lt., left; GKS, gamma-knife surgery; GPi, globus pallidus internus; -M, movement subscale; -D, disability subscale.
