# Supplementary material for: Long-Term Outcomes of Deep Brain Stimulation in Pantothenate Kinase-Associated Neurodegeneration-Related Dystonia
Source: PubMed Central journal article supplement — J Mov Disord. 2022 Jul 26;15(3):241–8. doi: 10.14802/jmd.22002 (PMC9536911; doi:10.14802/jmd.22002), 2022-07-26
Supplement: jmd-22002-suppl2.pdf [file jmd-22002-suppl2.pdf]

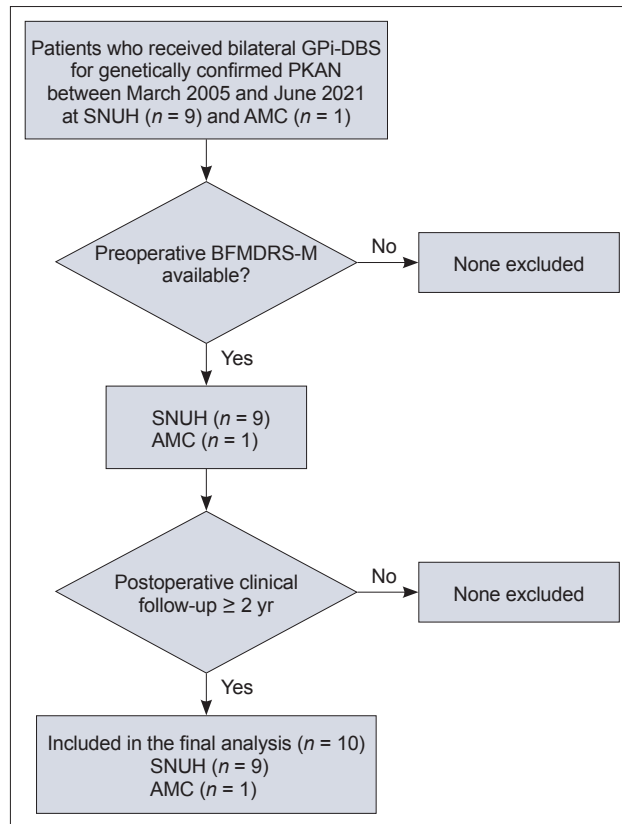

**Supplementary Figure 1.** Flowchart of the study patients. Patients with genetically confirmed PKAN with a clinical diagnosis of neurodegeneration with brain iron accumulation (NBIA) who received bilateral GPI-DBS for moderate to severe medically intractable dystonia were eligible for the study. Patients who were evaluated for BFMDRS-M score by a movement disorder specialist before surgery and had information available regarding clinical status after DBS implantation for  $\geq 2$  years postoperatively were included. GPI-DBS, globus pallidus internus deep brain stimulation; PKAN, pantothenate kinase-associated neurodegeneration; SNUH, Seoul National University Hospital; AMC, Asan Medical Center; BFMDRS-M, Burke–Fahn–Marsden Dystonia Rating Scale motor subscale.
